# Supplementary material for: Suppression of auxin signalling promotes rice susceptibility to Rice black streaked dwarf virus infection
Source: PubMed Central journal article supplement (PMC6640184; doi:10.1111/mpp.12814), 2019-06-27
Supplement: MPP-20-1093-s001.pdf [file MPP-20-1093-s001.pdf]

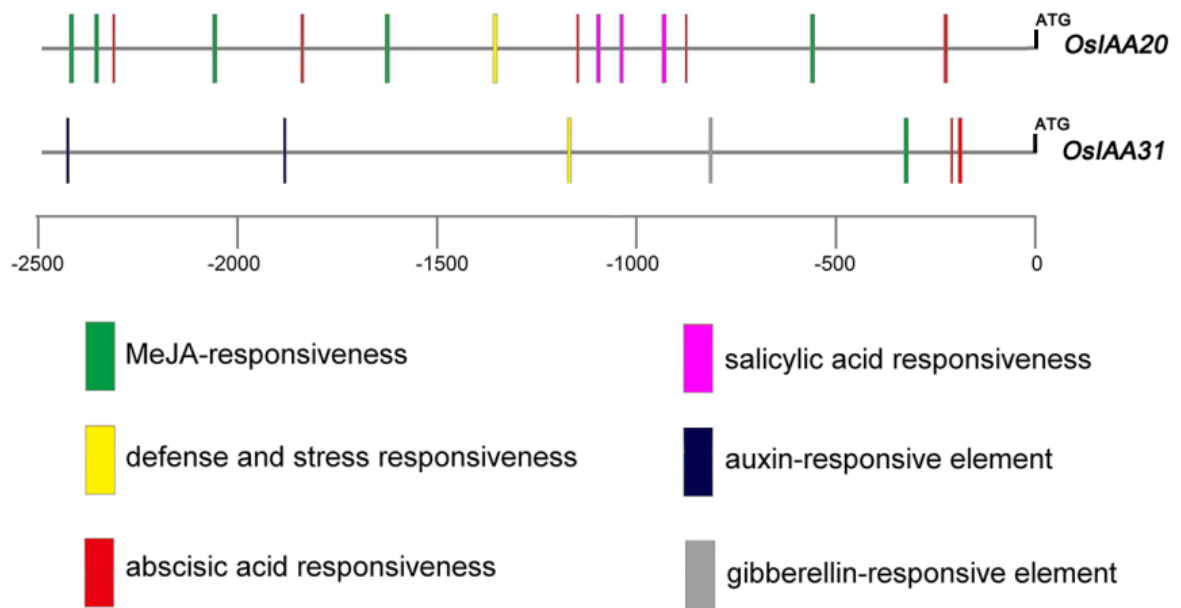

**Fig. S1** The *cis*-element in the promoters of *OsIAA20* and *OsIAA31*. The 2.5 kb promoter sequence of *OsIAA20* and *OsIAA31* were analysed by PLANTCARE program. The different colours indicated the different binding element.
