# Supplementary material for: Suppression of auxin signalling promotes rice susceptibility to Rice black streaked dwarf virus infection
Source: PubMed Central journal article supplement (PMC6640184; doi:10.1111/mpp.12814), 2019-06-27
Supplement: MPP-20-1093-s002.pdf [file MPP-20-1093-s002.pdf]

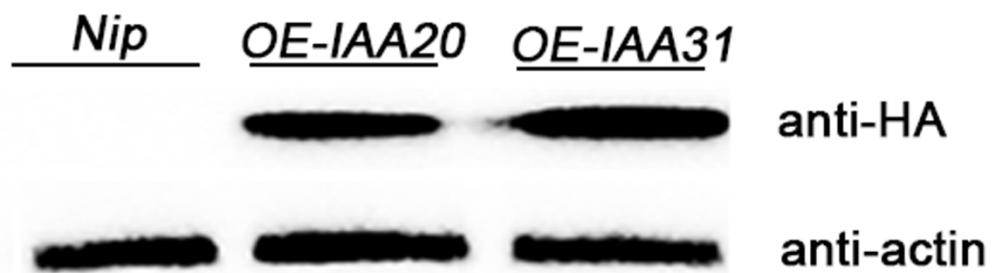

**Fig. S2** Western blot of leaf extracts to confirm the overexpression of *OE-IAA20* and *OE-IAA31* in the respective transgenic plants compared to the *Nip* control. Proteins were detected using the HA antibody. Actin antibody was used as an internal reference.
