# Supplementary material for: Suppression of auxin signalling promotes rice susceptibility to Rice black streaked dwarf virus infection
Source: PubMed Central journal article supplement (PMC6640184; doi:10.1111/mpp.12814), 2019-06-27
Supplement: MPP-20-1093-s003.pdf [file MPP-20-1093-s003.pdf]

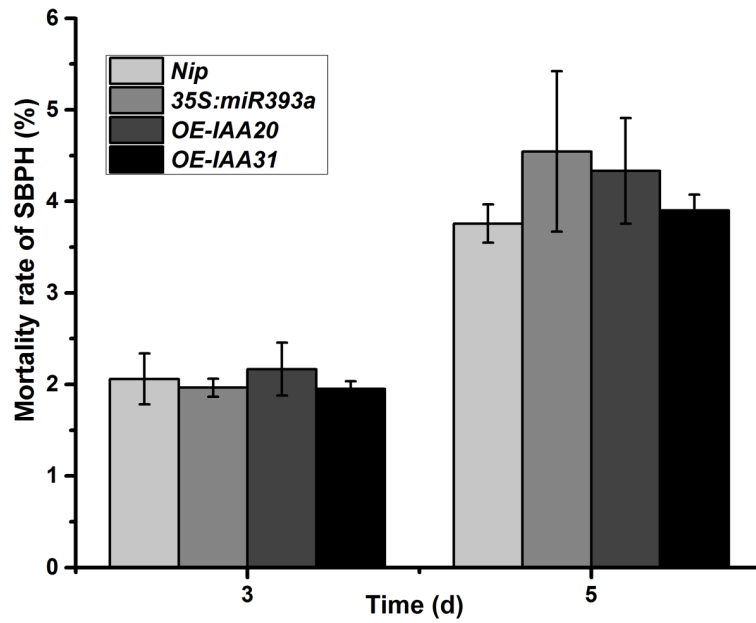

**Fig. S3** The mortality of small brown planthoppers on control (*Nip*) and auxin signalling mutant plants. Ten-day-old seedlings were infested with SBPH at 7 insects per seedling and insect survival was measured 3 and 5 d later. Each treatment used at least 20 seedlings. Data are means  $\pm$  SD from three biological replicates.
