# Supplementary material for: Suppression of auxin signalling promotes rice susceptibility to Rice black streaked dwarf virus infection
Source: PubMed Central journal article supplement (PMC6640184; doi:10.1111/mpp.12814), 2019-06-27
Supplement: MPP-20-1093-s004.pdf [file MPP-20-1093-s004.pdf]

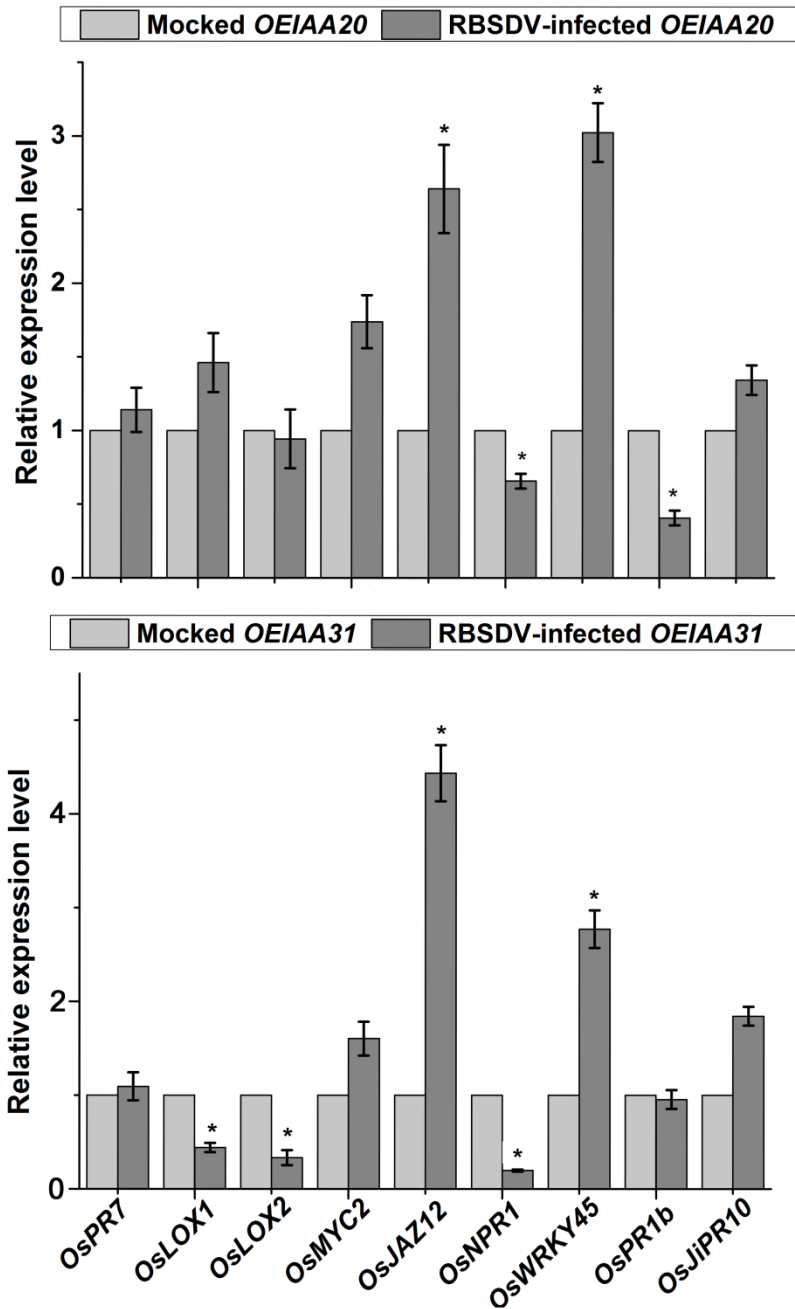

**Fig. S4** The expression levels of jasmonic acid (JA) or salicylic acid (SA) pathway genes in *OE-IAA20* (upper panel) and *OE-IAA31* (lower panel) mutants in response to RBSDV. Data are shown as relative expression levels of virus-infected plants in comparison to the control plants. UBQ5 was used as the internal reference gene. Values are means  $\pm$ SD of three biological replicates. Statistically significant differences from the control are indicated: \*,  $p \leq 0.01$ .
